# Supplementary material for: Synthesis of monodisperse chromium nanoparticles from the thermolysis of a Fischer carbene complex
Source: Royal Society of Chemistry journal article supplement (doi:10.1039/b411656a), 2004-11-26

*Electronic Supplementary Information for*

**Synthesis of Monodisperse Chromium Nanoparticles from the Thermolysis of a Fischer Carbene Complex**

Seung Uk Son,a Youngjin Jang,a Ki Youl Yoon,a Changhua An,a Yosun Hwang,b Je-Geun Park,b Han-Jin Noh,c Jae-Young Kim,c Jae-Hoon Parkd and Taeghwan Hyeon*a

a National Creative Research Initiative Center for Oxide Nanocrystalline Materials and School of Chemical Engineering, Seoul National University, Seoul 151-744, Korea.

Fax: 82-2-886-8457; Tel: 82-2-880-7150; E-mail: thyeon@plaza.snu.ac.kr

b Department of Physics, Sungkyunkwan University, Suwon 440-746, Korea.

c Pohang Accelerator Laboratory, Pohang University of Science and Technology, Pohang, Kyungbuk 790-784, Korea.

d Department of Physics, Pohang University of Science and Technology, Pohang, Kyungbuk 790-784 Korea.

**Fig. S1** HRTEM image of and ED pattern of 6.0 nm Cr nanoparticles


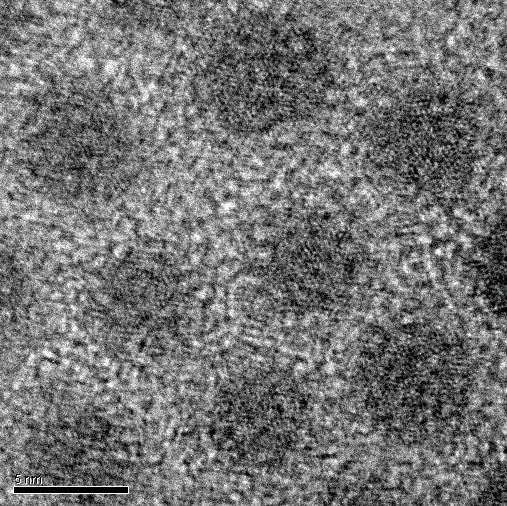

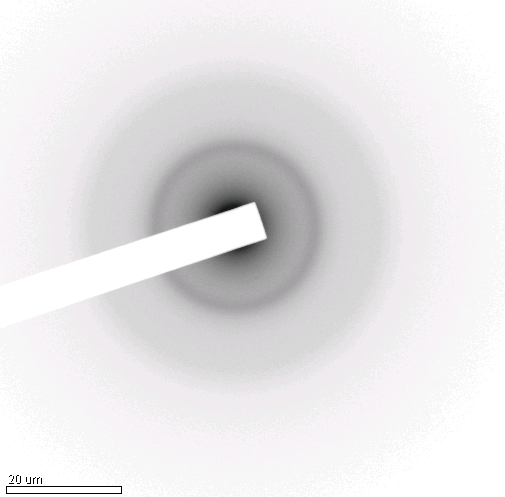

Supplement: b411656a.doc [file b411656a.doc]
